# Supplementary figures and images for: Nano PGE1 Enhances Phosphorylation of ERK1/2 and Akt to Promote Recovery from Motor Dysfunction and Muscle Atrophy Induced by Sciatic Nerve Injury
Source: Preprints.org preprint supplement (doi:10.20944/preprints201901.0250.v1), 2019-01-24

(A) Injured sciatic nerve

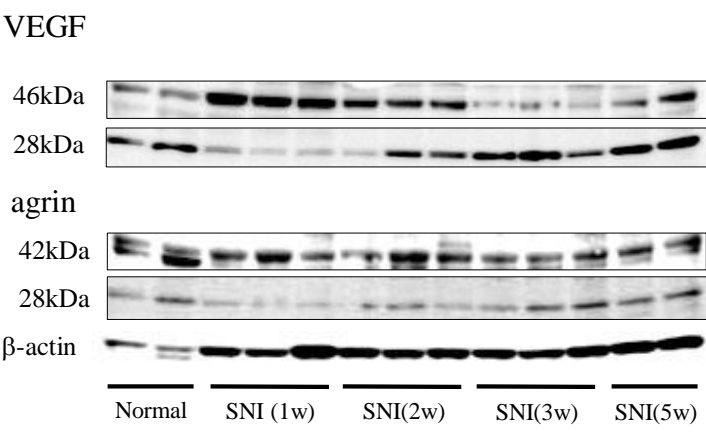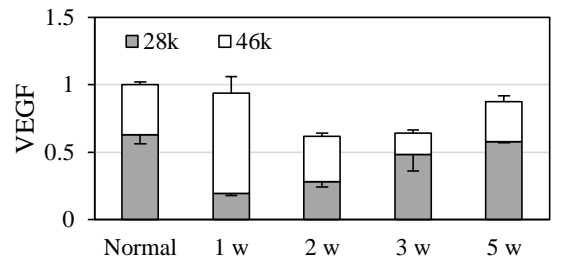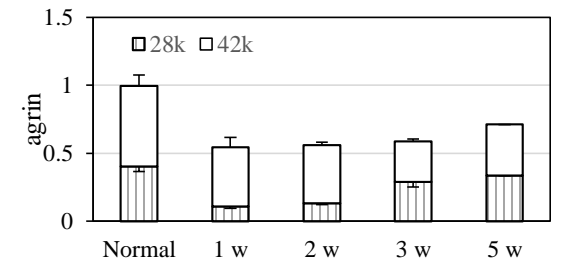

(B) Atrophic muscle

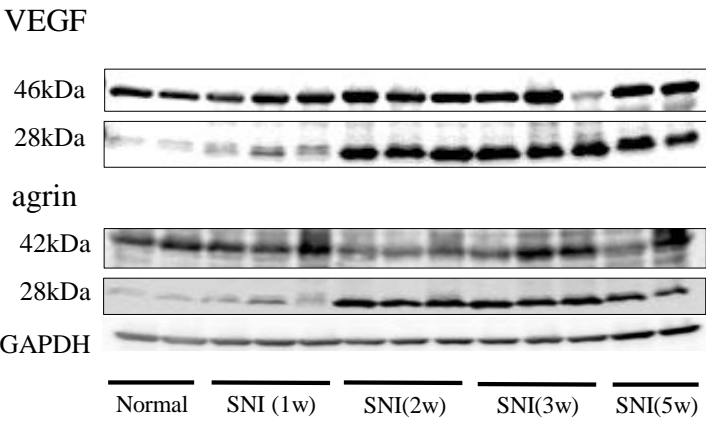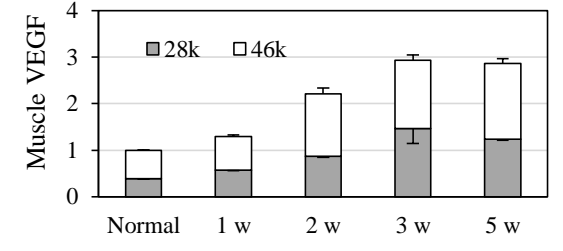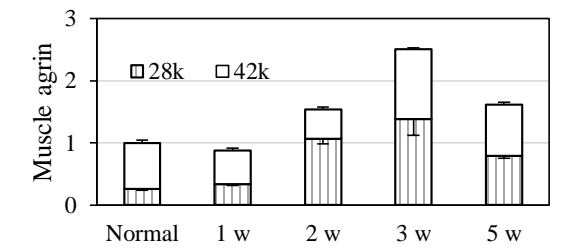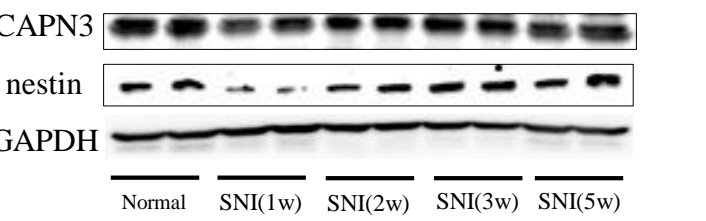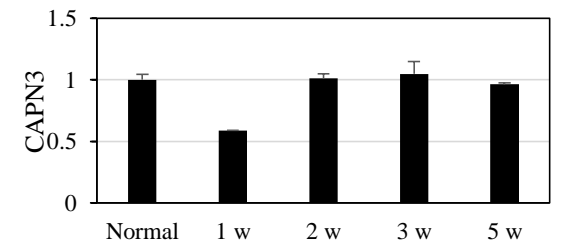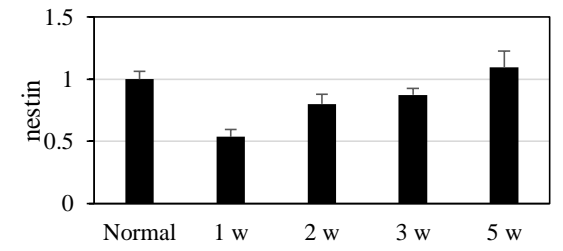

Supplemental Fig. 1 (Fig. S1)

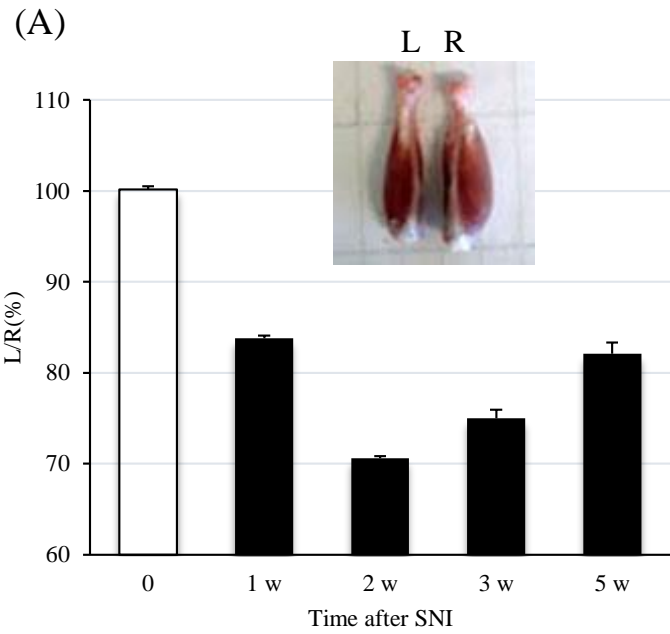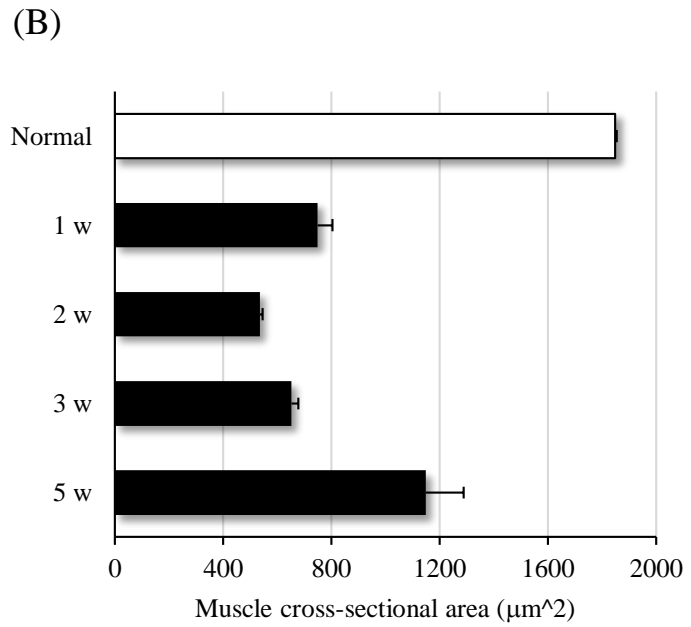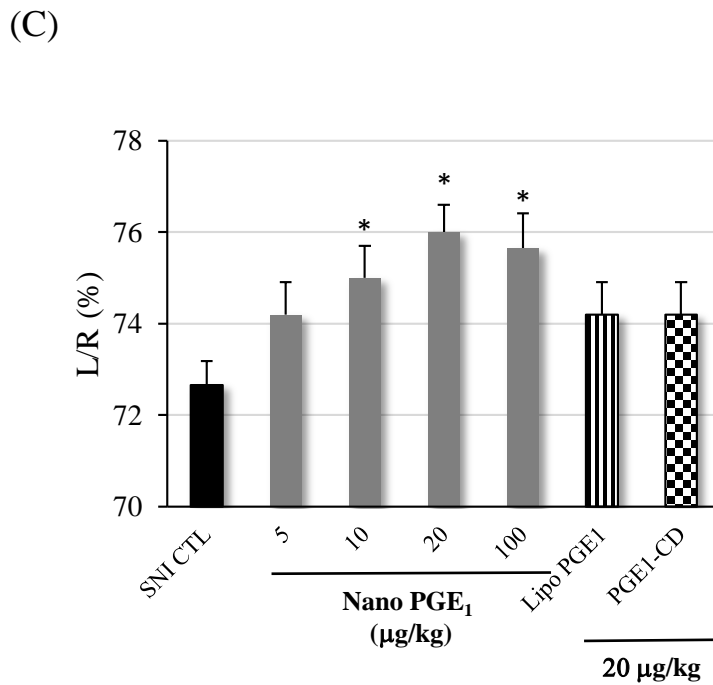

Supplemental Fig. 2 (Fig. S2)

Supplement: Supplementary file 1 [file supplementary]
